# Supplementary material for: Mutations in STAG2 cause an X‐linked cohesinopathy associated with undergrowth, developmental delay, and dysmorphia: Expanding the phenotype in males
Source: PubMed Central journal article supplement (PMC6393687; doi:10.1002/mgg3.501), 2018-11-16

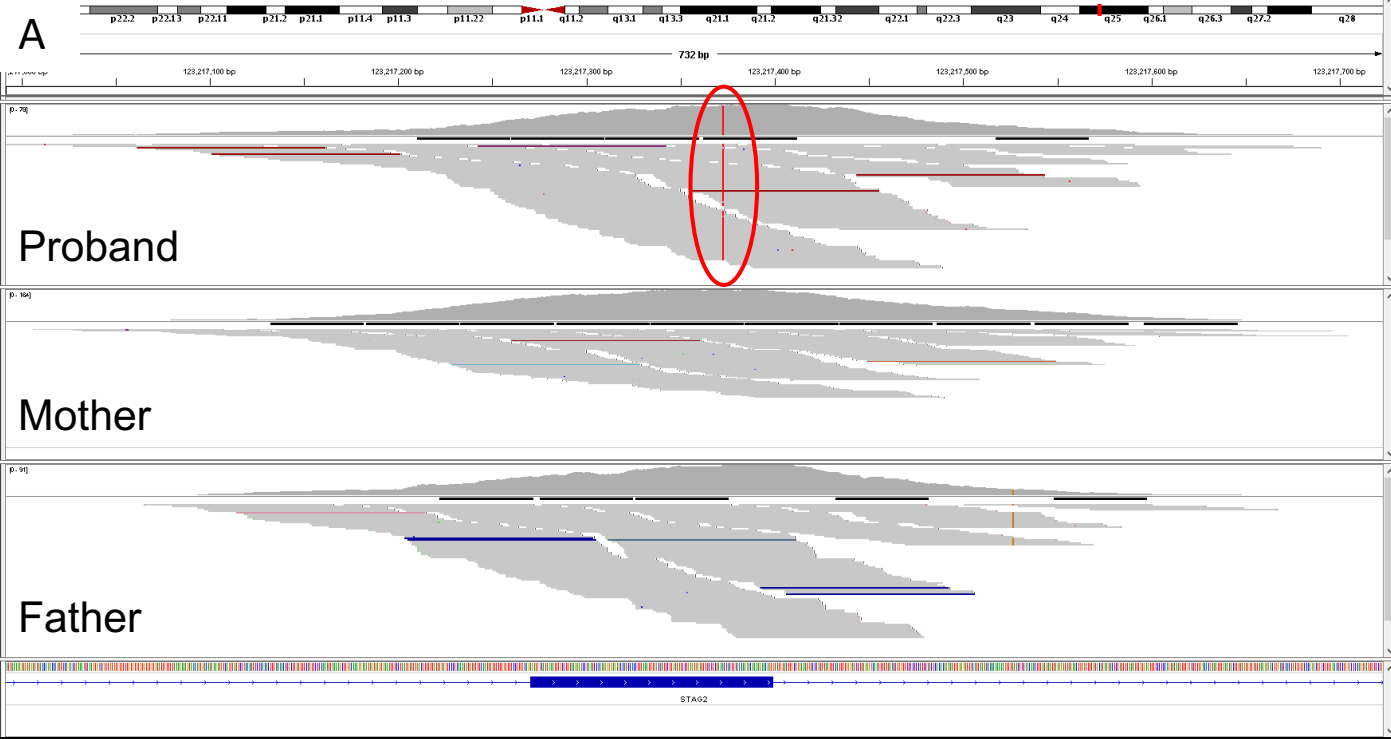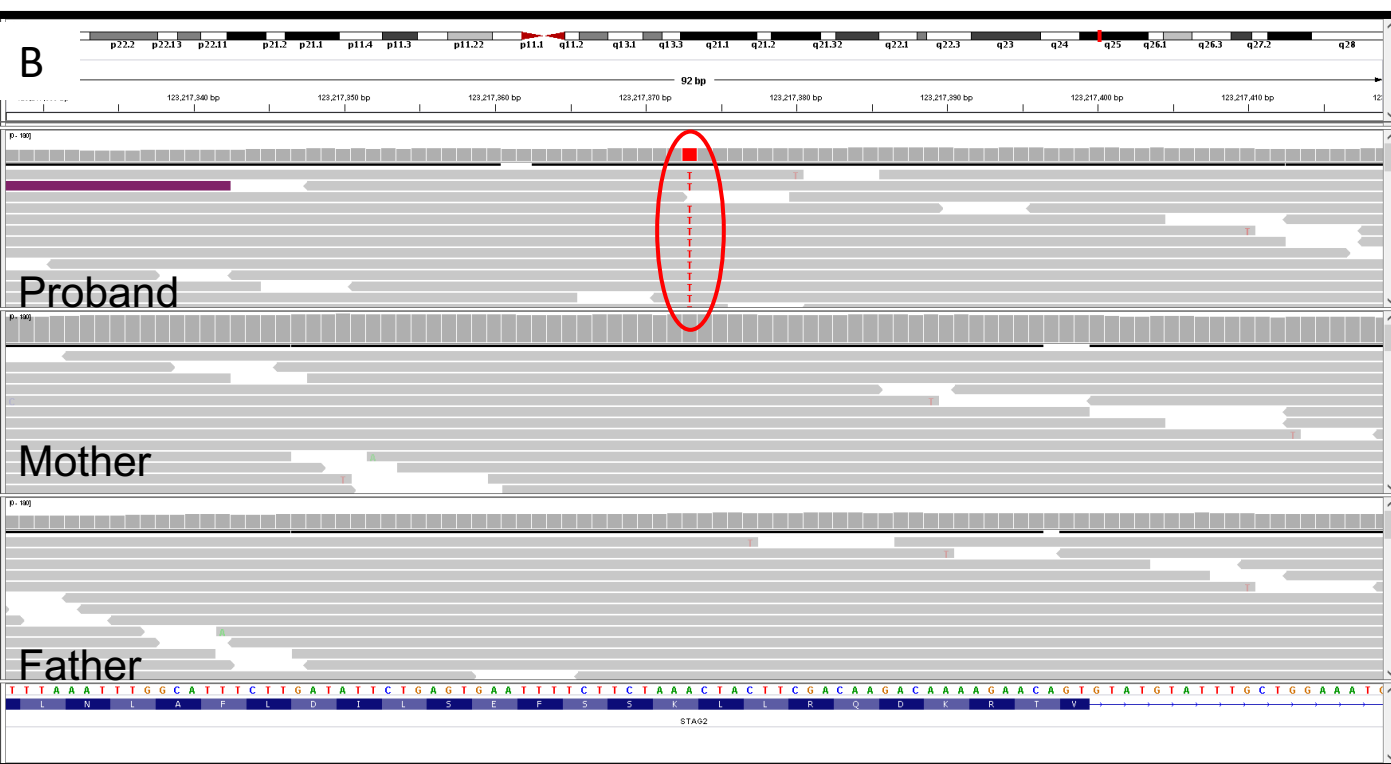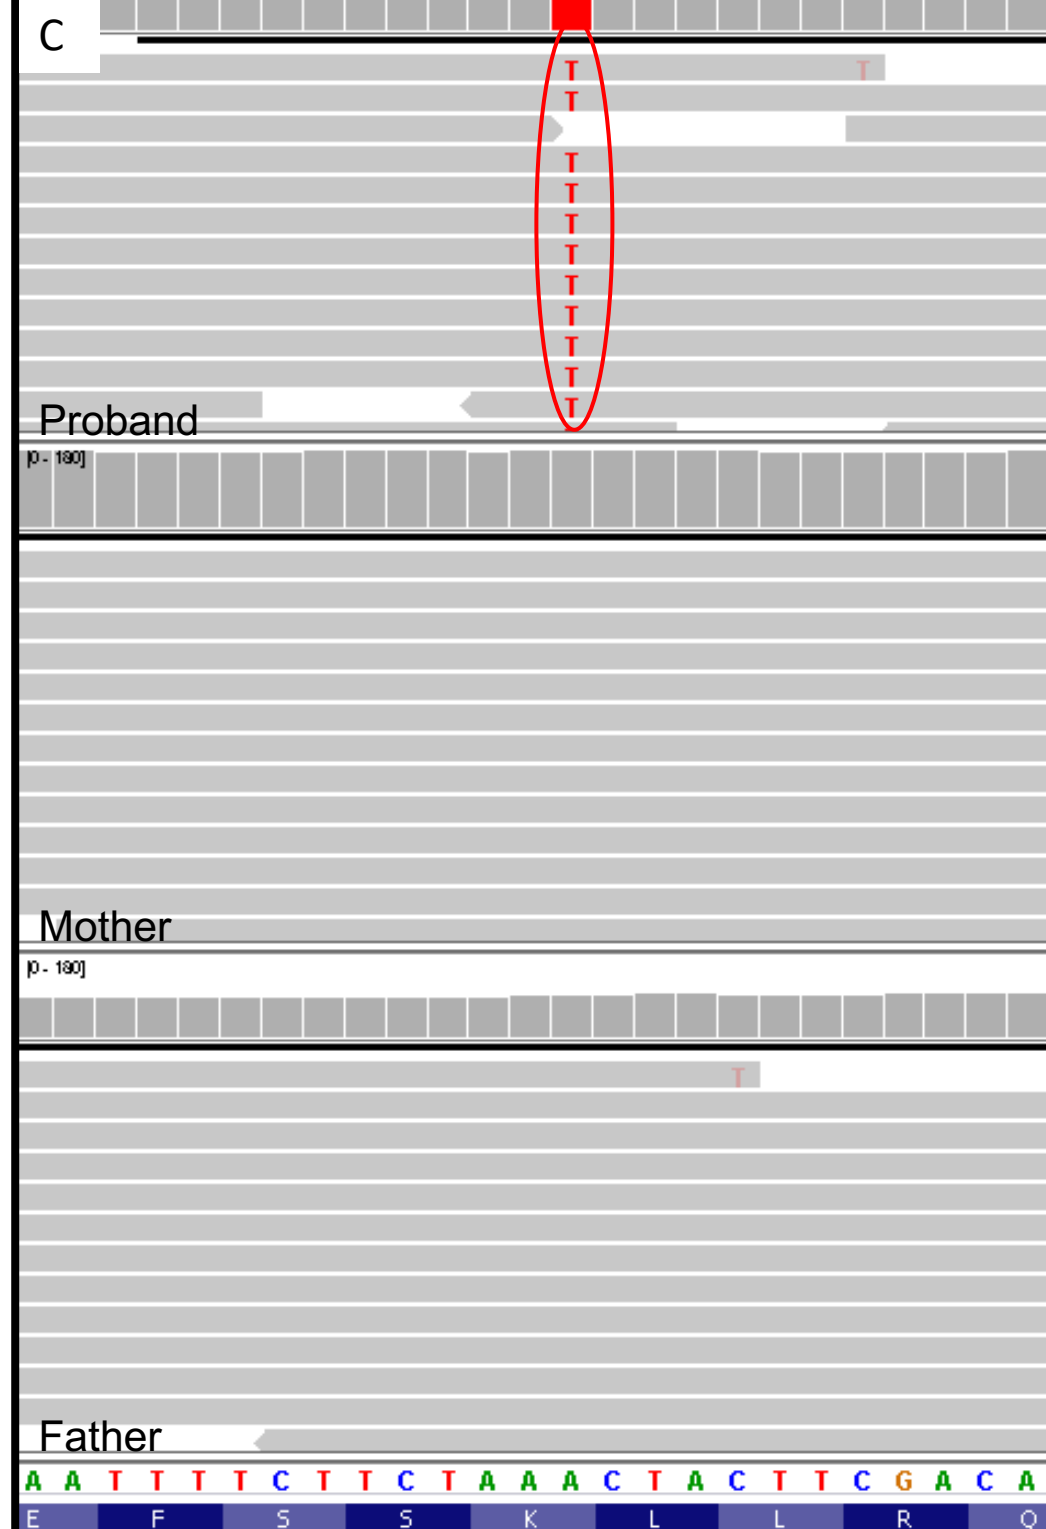

Supplement: MGG3-7-na-s001.pdf [file MGG3-7-na-s001.pdf]
